# Supplementary material for: Does spatial proximity drive norovirus transmission during outbreaks in hospitals?
Source: HighWire-hosted journal article supplement (doi:10.1136/bmjopen-2013-003060), 2013-07-01

Figure 1\_supplement. Comparison of results from modelling approaches, main analysis and sensitivity analyses.

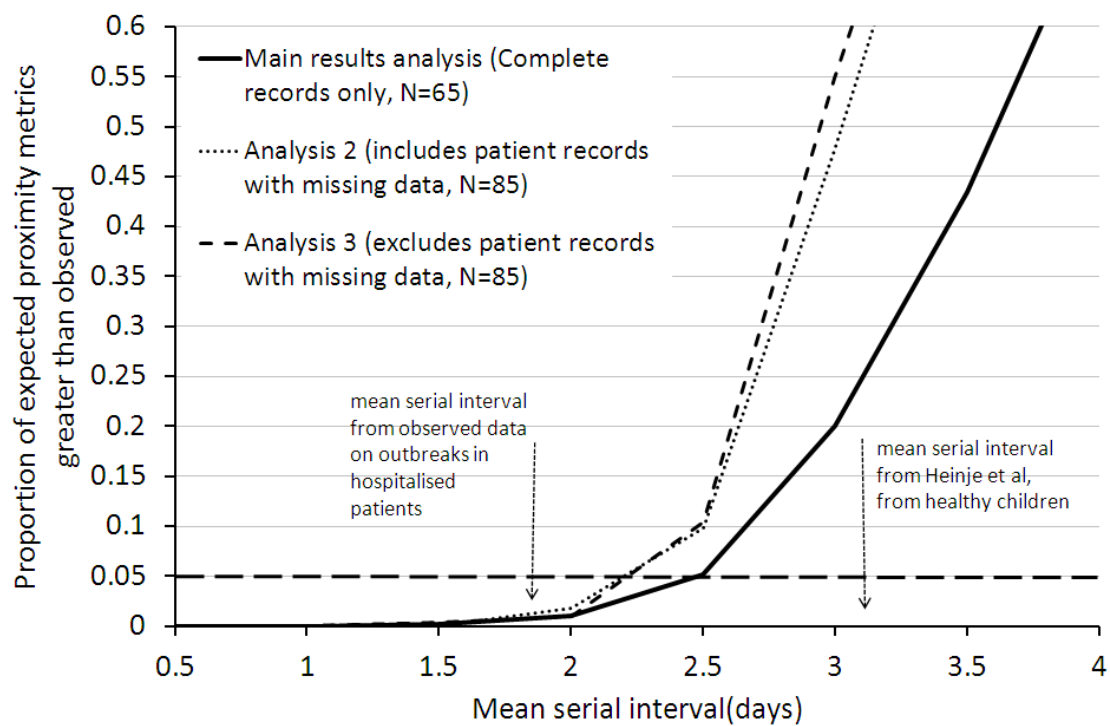

Supplement: bmjopen-2013-003060supp_figure.pdf [file bmjopen-2013-003060supp_figure.pdf]
